# Supplementary material for: 5G Wireless Communication and Health Effects—A Pragmatic Review Based on Available Studies Regarding 6 to 100 GHz
Source: PubMed Central journal article supplement (PMC6765906; doi:10.3390/ijerph16183406), 2019-09-13
Supplement: ijerph-16-03406-s001.pdf [file ijerph-16-03406-s001.pdf]

## 5G Wireless Communication and Health Effects – A Pragmatic Review Based on Available Studies Regarding 6 to 100 GHz

TableS1. Master-table of the selected (*in vivo* and *in vitro*) studies and the extracted physical, biological, and quality parameters.

| Reference | Animal/tissue                  | Primary cell                                                        | Cell line | Frequency                  | Power density                                       | SAR (W/kg)       | Exposure duration        | Endpoint                | Effects | Sham | Dosimetry | Positive control | Blind | Temperature control |
|-----------|--------------------------------|---------------------------------------------------------------------|-----------|----------------------------|-----------------------------------------------------|------------------|--------------------------|-------------------------|---------|------|-----------|------------------|-------|---------------------|
| [1]       | Murine sural nerve             |                                                                     |           | 42.25 GHz                  | 10–30 mW/cm <sup>2</sup> ,<br>45 mW/cm <sup>2</sup> |                  | 20 s to 10 min           | Electrical activity     | Yes     | No   | Yes       | No               | No    | Yes                 |
| [2]       | Forearm and middle finger skin |                                                                     |           | 42.25 GHz                  | 208 and 55 mW/cm <sup>2</sup>                       |                  | Up to 10, 20 min         | Blood flow measurements | No      | No   | Yes       | No               | No    | Yes                 |
| [3]       |                                | Lymnaea neurons                                                     |           | 60.22–62.22 GHz and 75 GHz |                                                     | 0–2400 W/kg      | 5 min, 10 min and 20 min | Ionic current           | No      | Yes  | Yes       | No               | No    | No                  |
| [4]       |                                | BP-4 pacemaker neuron of the pond snail<br><i>Lymnaea stagnalis</i> |           | 75 GHz                     |                                                     | 600 to 4200 W/kg | 12–22 min                | Firing rate             | No      | Yes  | Yes       | No               | No    | Yes                 |

|      |                         |                                    |                                                                    |                         |           |                                                     |                                                                                      |     |     |     |    |    |     |
|------|-------------------------|------------------------------------|--------------------------------------------------------------------|-------------------------|-----------|-----------------------------------------------------|--------------------------------------------------------------------------------------|-----|-----|-----|----|----|-----|
| [5]  | Bilayer lipid membranes |                                    | 53-78 GHz; cw or square wave pulsed                                | Output power peak 20 mW | 2000 W/kg |                                                     | Transmembrane currents and ion channel conductance                                   | Yes | No  | Yes | No | No | Yes |
| [6]  | DBA2 and Swiss mice     |                                    | 60 GHz                                                             | 0.5 mW/cm <sup>2</sup>  |           | 30 min/session, 5 consecutive days/week until death | Cancer                                                                               | Yes | No  | Yes | No | No | Yes |
| [7]  |                         | RPMI 7932 human melanoma cell line | 53.57-78.33 GHz wide-band frequency range, 51.05 GHz and 65.00 GHz | Not given               |           | 1 h, every second day, 3 h every day, up to 7 days  | Proliferation, morphology                                                            | Yes | No  | No  | No | No | No  |
| [8]  |                         | MCF-7 Human Breast Cancer Cells    | 52-78 GHz                                                          | 0.07 μW/cm <sup>2</sup> |           | Not given                                           | Morphology/TEM                                                                       | Yes | No  | No  | No | No | No  |
| [9]  |                         | K562                               | 53-78 GHz                                                          | 1 μW/cm <sup>2</sup>    |           | 1 h every other day for 8 days                      | Proliferation behavior, the ultrastructural morphology and the glycolytic metabolism | Yes | No  | No  | No | No | No  |
| [10] |                         | RPMI7932                           | 42.20 GHz; 53.37 GHz                                               | 1 mW/cm <sup>2</sup>    |           | 1 h per day; 3 or 4 days                            | Cell proliferation - doubling time; cell cycle progression                           | No  | Yes | Yes | No | No | Yes |

|      |                                                                                                                                                                                          |                           |                                                  |                                                     |           |                                    |                                                                                                                                                    |     |     |     |     |     |     |
|------|------------------------------------------------------------------------------------------------------------------------------------------------------------------------------------------|---------------------------|--------------------------------------------------|-----------------------------------------------------|-----------|------------------------------------|----------------------------------------------------------------------------------------------------------------------------------------------------|-----|-----|-----|-----|-----|-----|
| [11] |                                                                                                                                                                                          | BHK-21/C13 cells          | 38-48 GHz; 65-75 GHz, both at 0.1 GHz increments | 0-354 mW/cm <sup>2</sup> , 0-584 mW/cm <sup>2</sup> | 1 h       | Protein synthesis                  | No                                                                                                                                                 | Yes | Yes | No  | No  | Yes |     |
| [12] | Mouse toe, electrically stimulated                                                                                                                                                       |                           | 94 GHz                                           | Not given                                           | 2, 25 min | <b>Skeletal muscle contraction</b> | Yes                                                                                                                                                | Yes | No  | Yes | No  | Yes |     |
| [13] |                                                                                                                                                                                          | HaCat Human Keratinocytes | 30.16 GHz                                        | 1.0 and 3.5 mW/cm <sup>2</sup>                      | 1 h       | Gap junction                       | Yes                                                                                                                                                | Yes | Yes | Yes | No  | Yes |     |
| [14] | Artificial axon consisting of a series of RC networks. Each network contains lipid vesicles filled with K <sup>+</sup> , causing a gradient of K <sup>+</sup> across the lipid membrane. |                           | 53.37 GHz                                        |                                                     | 1.1 W/kg  | Real-time measurements for 30 min  | Generation and appearance of action potentials; K <sup>+</sup> efflux from vesicles, potentiation of valinomycin (K <sup>+</sup> carrier) activity | Yes | Yes | Yes | No  | No  | Yes |
| [15] | Ganglion neurons of Helix pomatia and adult Wistar rats                                                                                                                                  |                           | 90-160 GHz                                       |                                                     | 1.49 W/kg | 1, 5, and 10 min                   | Medium as the target of effects                                                                                                                    | Yes | Yes | Yes | Yes | No  | Yes |

|      |                                                          |                        |                                           |                         |          |                                |                                                                                                                                                                                                                                                            |     |     |     |     |                    |     |
|------|----------------------------------------------------------|------------------------|-------------------------------------------|-------------------------|----------|--------------------------------|------------------------------------------------------------------------------------------------------------------------------------------------------------------------------------------------------------------------------------------------------------|-----|-----|-----|-----|--------------------|-----|
| [16] | Human forearm skin in 10 healthy volunteers              |                        | 50-75 GHz was scanned in 1 GHz increments | 14 mW/cm <sup>2</sup>   |          |                                | Dielectric properties at different frequencies in forearm skin corresponding to one acupuncture point and two control sites                                                                                                                                | Yes | No  | No  | No  | Yes (single blind) | No  |
| [17] |                                                          | Fetal HFFF2, adult HDF | 25 GHz                                    | 0.80 mW/cm <sup>2</sup> | 20 W/kg  | 20 min, at RT                  | DNA breaks (comet assay, g-H2AX phosphorylation); chromosome damage (MN-CREST); malsegregation - non disjunction (ND-FISH); telomere length modulation; apoptosis induction; cell cycle stages; prosurvival gene signalling, morphology and ultrastructure | Yes | Yes | Yes | No  | No                 | Yes |
| [18] | Sprague-Dawley rat                                       |                        | 35 GHz                                    | 75 mW/cm <sup>2</sup>   | 13 W/kg  | Until death (32-69min, 49 min) | Cardiovascular changes                                                                                                                                                                                                                                     | No  | Yes | Yes | No  | No                 | Yes |
| [19] | Normal BALB/c mice and mice with peritoneal inflammation |                        | 42.2 GHz                                  | 0.1 mW/cm <sup>2</sup>  | 1.5 W/kg | 20 min                         | Fatty acids in inflammation                                                                                                                                                                                                                                | Yes | Yes | Yes | Yes | Yes                | Yes |

|      |                                |                                                         |                            |                                                  |                |                |                                                                                                                     |     |     |     |     |    |     |
|------|--------------------------------|---------------------------------------------------------|----------------------------|--------------------------------------------------|----------------|----------------|---------------------------------------------------------------------------------------------------------------------|-----|-----|-----|-----|----|-----|
| [20] | NMRI mice                      |                                                         | 37.5 – 70 GHz, 42.2 GHz    | 0.01 mW/cm <sup>2</sup> , 0.1 mW/cm <sup>2</sup> | 0.15, 1.5 W/kg | 20 min, 40 min | Footpad edema                                                                                                       | Yes | Yes | Yes | Yes | No | Yes |
| [21] |                                | Neutrophils of NMRI mice                                | 41.75–42.15 GHz, 41.95 GHz | 150 μW/cm <sup>2</sup> , 240 μW/cm <sup>2</sup>  |                | 40 min         | ROS                                                                                                                 | Yes | No  | Yes | No  | No | No  |
| [22] |                                | Vero (green african marmoset) kidney cells              | 42.25 GHz                  | 100 μW/cm <sup>2</sup>                           |                | 20-30 min      | Activity of calcium-dependent potassium-ion channels                                                                | Yes | Yes | No  | No  | No | Yes |
| [23] | The yeast <i>S. Cerevisiae</i> |                                                         | 48.6-48.9 GHz              | 2 mW/cm <sup>2</sup>                             |                | Over night     | Cell growth (absorbance at 525 nm)                                                                                  | Yes | No  | No  | No  | No | Yes |
| [24] |                                | PC12                                                    | 60.4 GHz                   | 10 mW/cm <sup>2</sup>                            |                | 24 h           | Protein expressions of HSP70, TRPV1, TRPV2, and P2 3                                                                | No  | Yes | Yes | Yes | No | Yes |
| [25] |                                | Rat adrenal medulla PC12 cells treated with NGF         | 60.4 GHz                   | 10 mW/cm <sup>2</sup>                            |                | 24 h           | Dopamine levels and turnover (DOPAC levels and dopamine/DOPAC ratios); DAT (dopamine transporter) expression levels | No  | Yes | Yes | Yes | No | Yes |
| [26] |                                | Rat adrenal medulla PC12 cells, subclone Neuroscreen -1 | 60.4 GHz                   | 10 mW/cm <sup>2</sup>                            |                | 24 h           | Membrane and stress related protein expression                                                                      | No  | Yes | Yes | Yes | No | Yes |

|      |                                                                            |                                                                             |                                                               |                                                   |          |                         |                                                           |     |     |     |     |     |     |
|------|----------------------------------------------------------------------------|-----------------------------------------------------------------------------|---------------------------------------------------------------|---------------------------------------------------|----------|-------------------------|-----------------------------------------------------------|-----|-----|-----|-----|-----|-----|
| [27] |                                                                            | Human keratinocytes                                                         | 60 GHz                                                        | 20 mW/cm <sup>2</sup>                             | 594 W/kg | 1-3 h, 3 h              | Whole gene expression approach                            | No  | Yes | Yes | Yes | No  | Yes |
| [28] | Albino mice and C57Bl/6 mice                                               |                                                                             | 37 GHz                                                        | 10 mW/cm <sup>2</sup>                             |          | 3.5 h/day for one month | Pathomorphological changes                                | Yes | No  | No  | No  | No  | No  |
| [29] | Sprague-Dawley rats                                                        |                                                                             | 35-GHz                                                        | 75 mW/cm <sup>2</sup>                             |          | 19.3±1.3, 38.2±2.7 min  | Pathophysiology, whole body heating effects               | No  | Yes | Yes | No  | No  | Yes |
| [30] | Dutch rabbit, eye                                                          |                                                                             | 60 GHz                                                        | 475 mW/cm <sup>2</sup> , 1.898 mW/cm <sup>2</sup> |          | 6, 30 min               | Acute ocular injury                                       | No  | Yes | Yes | No  | No  | No  |
| [31] | Male Dutch-belted pigmented rabbits                                        |                                                                             | 40 GHz; 75 GHz; 95 GHz.                                       | 10-400 mW/cm <sup>2</sup>                         |          | 6 min; 30 min           | Corneal epithelial damage                                 | Yes | Yes | No  | Yes | No  | Yes |
| [32] |                                                                            | Human lymphocytes                                                           | 100 GHz                                                       | 0.031 mW/cm <sup>2</sup>                          | 2.4 W/kg | 1, 2 and 24 h a         | Genetic effects, proliferation                            | Yes | Yes | Yes | No  | No  | No  |
| [33] | <i>Acricotopus lucidus</i> (Chironomidae) salivary gland giant chromosomes |                                                                             | 64.1-69.1 GHz (sweep, sweep time 6 s); 67.200 GHz; 68.200 GHz | ≤6 mW/cm <sup>2</sup>                             |          | 2 h                     | Chromosome puff sizes                                     | Yes | Yes | Yes | No  | Yes | Yes |
| [34] |                                                                            | Human corneal epithelial (HCE-T) and human lens epithelial (SRA01/04) cells | 60 GHz                                                        | 1 mW/cm <sup>2</sup>                              |          | 24 h                    | Micronucleus formation, DNA strand breaks, HSP expression | No  | Yes | Yes | Yes | No  | Yes |

|      |                                             |                                                                           |           |                          |              |                                     |                                                                                              |     |     |     |     |     |     |
|------|---------------------------------------------|---------------------------------------------------------------------------|-----------|--------------------------|--------------|-------------------------------------|----------------------------------------------------------------------------------------------|-----|-----|-----|-----|-----|-----|
| [35] | Rabbit, Rhesus monkey (Macaca mulatta), Eye |                                                                           | 61 GHz    | 1 mW/cm <sup>2</sup>     |              | 8 h, 5 x 4 h on consecutive days    | Ocular injury                                                                                | No  | Yes | Yes | No  | No  | No  |
| [36] | Primary human skin                          |                                                                           | 60.4 GHz  | 1.8 mW/cm <sup>2</sup>   | 42.4 W/kg    | 1, 6, or 24 h                       | Whole-Genome Expression Analysis                                                             | Yes | Yes | Yes | No  | No  | Yes |
| [37] |                                             | Human melanoma cell line A375 and the human keratinocyte cell line, HaCat | 60 GHz    | 1, 20 mW/cm <sup>2</sup> |              | 20 min, 1 h, 6 h, 16 h, or 24 h     | Endoplasmic reticulum stress sensor gene expression                                          | No  | Yes | Yes | Yes | No  | Yes |
| [38] | SD rats chondrocytes                        |                                                                           | 30-40 GHz | 4 mW/cm <sup>2</sup>     |              | 4 x for 15, 30 or 60 min every 12 h | G1/S cell cycle progression                                                                  | Yes | Yes | No  | No  | No  | No  |
| [39] | SKH-1 mouse, midback, blood                 |                                                                           | 42.2 GHz  | 31 mW/cm <sup>2</sup>    | 622 W/kg     | 30 min/d, 5 d/week for 3 weeks      | Catalase, also pretreated with cyclophosphamide (CPA)                                        | No  | Yes | Yes | Yes | No  | No  |
| [40] | Mouse/BALB/c, nose area                     |                                                                           | 42.2 GHz  | 32 mW/cm <sup>2</sup>    | 622 W/kg     | 30 min/day for 3 days               | CPA induced leukopenia and myelosuppression                                                  | No  | Yes | Yes | Yes | No  | No  |
| [41] | BALB/c mouse, nose                          |                                                                           | 42.2 GHz  | 31.5 mW/cm <sup>2</sup>  | 622 100 W/kg | 30 min daily for 3 days             | T cell activation, proliferation, and effector functions in pretreated with cyclophosphamide | Yes | Yes | Yes | Yes | Yes | Yes |

---

(CPA)

|      |                             |                |                                                  |          |                                    |       |                                                                                                                                                                                                                                                 |     |     |     |     |     |     |
|------|-----------------------------|----------------|--------------------------------------------------|----------|------------------------------------|-------|-------------------------------------------------------------------------------------------------------------------------------------------------------------------------------------------------------------------------------------------------|-----|-----|-----|-----|-----|-----|
| [42] | BALB/c mouse, nose          | 61.22 GHz      | 31.5 mW/cm <sup>2</sup>                          | 885 W/kg | 100 min/day for 3 consecutive days | 30    | Modulation of the effect of cyclophosphamide (CPA)                                                                                                                                                                                              | Yes | Yes | Yes | No  | No  | Yes |
| [43] | BALB/c mouse, nose          | 42.2 GHz       | 31.5 mW/cm <sup>2</sup>                          | 623 W/kg | 100 min daily for 3 days           | 31    | Pretreated with CPA, cell viability/cell division/proliferation: cytotoxicity, effects on the immune system: natural killer cell activation (flow cytometry; expression of CD69); cytotoxicity); cytokine measurement (TNF-alpha and IFN-gamma) | Yes | Yes | Yes | Yes | Yes | Yes |
| [44] | (DMBA)-induced SENCAR mouse | 94 GHz         | 1000 mW/cm <sup>2</sup> , 333 mW/cm <sup>2</sup> |          | 10 sec, 10 s/week for 12 weeks     | 10    | Skin carcinogenesis                                                                                                                                                                                                                             | No  | Yes | Yes | Yes | No  | Yes |
| [45] | Sprague-Dawley rats         | 35 GHz, 94 GHz | 75 mW/cm <sup>2</sup> , 90 mW/cm <sup>2</sup>    |          | 60-70 min                          | 60-70 | Temperature changes in skin, subcutis, and colon, and the time to reach circulatory collapse (mean arterial blood pressure, 20 mm Hg)                                                                                                           | Yes | Yes | Yes | Yes | No  | Yes |

---



|      |                                                                                                                                                                                                     |                           |            |                       |            |                                                             |                                                                                                                  |     |     |     |     |    |     |
|------|-----------------------------------------------------------------------------------------------------------------------------------------------------------------------------------------------------|---------------------------|------------|-----------------------|------------|-------------------------------------------------------------|------------------------------------------------------------------------------------------------------------------|-----|-----|-----|-----|----|-----|
| [46] |                                                                                                                                                                                                     |                           | 35 GHz     | 75 mW/cm <sup>2</sup> |            | Until the colonic temperature reached 41– 42 C (ca. 60 min) | Gene expression, histopathology                                                                                  | No  | Yes | Yes | Yes | No | Yes |
| [47] | 160 adult (3 months old) male albino rats.                                                                                                                                                          | Heart muscle cells/tissue | 90–160 GHz | 1.49 mw/g             | 10, 15 min |                                                             | [3h]-ouabain binding with cell membrane, 45ca <sup>2+</sup> uptake and intracellular cyclic nucleotides contents | Yes | Yes | No  | Yes | No | Yes |
| [48] | Branhamella catarrhalis ATCC 23246, Kocuria rosea CIP 71.15T, Staphylococcus aureus CIP 65.8, ATCC 25923, Streptomyces griseus ATCC 23915 bacterial strains, and the yeast Saccharomyces cerevisiae |                           | 18 GHz     | 3 kw/kg and 5 kw/kg   | Up to 1 h  |                                                             | (46 nm) nanopsheres uptake                                                                                       | Yes | Yes | Yes | Yes | No | Yes |

|      |                                                    |                       |                                                                                                              |                                                      |                               |                 |                                                                                                                                         |          |     |     |     |    |     |
|------|----------------------------------------------------|-----------------------|--------------------------------------------------------------------------------------------------------------|------------------------------------------------------|-------------------------------|-----------------|-----------------------------------------------------------------------------------------------------------------------------------------|----------|-----|-----|-----|----|-----|
| [49] |                                                    | Human glial U-251 MG, | 59.16, 60.43, and 61.15 GHz, 59.87 and 60.83 GHz                                                             | 0.14 mW/cm <sup>2</sup>                              | 2.64 – 0.08 to 3.3 – 0.1 W/kg | 24 h            | Expression of endogenous ER-stress biomarkers, namely, the chaperones bip/GRP78 and ORP150/GRP170, qpcr                                 | No       | Yes | Yes | Yes | No | Yes |
| [50] |                                                    | Human glial U-251 MG, | 60.4 GHz                                                                                                     | 0.14 mW/cm <sup>2</sup>                              |                               | 24, 48, or 72 h | ER protein folding and secretion, induction of XBP1 or ATF6 transcription factors maturation, expression of ER-stress sensor, bip/GRP78 | No       | Yes | Yes | Yes | No | Yes |
| [51] | Frog isolated nerve (n. Ischiadicus + n. Peroneus) |                       | 41.34 GHz + high-rate electrical stimulation of the nerve (I-IRS, 20 twin pulsess- ,9msinter-pulseinterva l) | 0.02, 0.1, 0.5, or 2.6 mW/cm <sup>2</sup>            |                               | 23 min          | Action potential                                                                                                                        | Yes      | Yes | Yes | No  | No | Yes |
| [52] | Isolated frog sciatic nerve                        |                       | 40–52 GHz                                                                                                    | 0.24–3.0 mW/cm <sup>2</sup> , 2–3 mW/cm <sup>2</sup> |                               | 10–60 min       | Action potential                                                                                                                        | Yes      | Yes | Yes | No  | No | Yes |
| [53] |                                                    | BHK-21/C13 cells      | 41.8 GHz; 74.0 GHz                                                                                           | 320 mW/cm <sup>2</sup> , 450 mW/cm <sup>2</sup>      |                               | 1 h             | RNA and protein synthesis; cell morphology                                                                                              | Yes/ no. | Yes | Yes | No  | No | Yes |

|      |                                                 |                             |                                                                                     |                             |                         |                                                                                                                                                                                                       |                                          |     |     |     |     |    |     |
|------|-------------------------------------------------|-----------------------------|-------------------------------------------------------------------------------------|-----------------------------|-------------------------|-------------------------------------------------------------------------------------------------------------------------------------------------------------------------------------------------------|------------------------------------------|-----|-----|-----|-----|----|-----|
| [54] | 20 healthy male volunteers                      |                             | 42.25 GHz (active generator); mw within 50–75 GHz frequency range (noise generator) | <17.2 mW/cm <sup>2</sup>    | 30 min                  | Pain threshold, measured using the cold pressor test cpt and heart rate, blood pressure, incidence of subjective sensations (paresthesia) during exposure, as well as quality of volunteers' blinding | No                                       | Yes | No  | No  | Yes | No |     |
| [55] | Organotypic cortical slices                     | Organotypic cortical slices |                                                                                     | 60.125 GHz                  | 1 μW/cm <sup>2</sup>    | 1 min                                                                                                                                                                                                 | Action potential                         | Yes | No  | No  | Yes | No | Yes |
| [56] | Swiss Webster outbred mice                      |                             |                                                                                     | 61.22 GHz                   | 15 mW/cm <sup>2</sup>   | 15 min                                                                                                                                                                                                | Hypoalgnesia                             | Yes | Yes | Yes | Yes | No | Yes |
| [57] | Swiss Webster outbred mice                      |                             |                                                                                     | 61.22 GHz                   | 15 mW/cm <sup>2</sup>   | 15 min                                                                                                                                                                                                | Gut transit and colorectal passage       | No  | Yes | Yes | Yes | No | Yes |
| [58] | Swiss Webster mice, nose                        |                             |                                                                                     | 42.25, 53.57, and 61.22 GHz | 13.3 mW/cm <sup>2</sup> | 15 min                                                                                                                                                                                                | Hypoalgnesia                             | Yes | Yes | Yes | Yes | No | Yes |
| [59] | Swiss Webster outbred mice, head/nose           |                             |                                                                                     | 61.22 GHz                   | 13.3 mW/cm <sup>2</sup> | 15 min, 15 min/day for 5 days                                                                                                                                                                         | Melanoma                                 | Yes | Yes | Yes | Yes | No | Yes |
| [60] | Swiss albino mouse, plantar surface of hind paw |                             |                                                                                     | 61.22 GHz                   | 15 mW/cm <sup>2</sup>   | 15 min                                                                                                                                                                                                | Hypoalgnesia, Cold-water tail flick test | Yes | Yes | Yes | No  | No | Yes |

|      |                                                                                  |           |                                        |         |                                                                     |                                                                                            |     |     |     |     |     |     |
|------|----------------------------------------------------------------------------------|-----------|----------------------------------------|---------|---------------------------------------------------------------------|--------------------------------------------------------------------------------------------|-----|-----|-----|-----|-----|-----|
| [61] | Swiss albino mouse, nose; glabrous skin of right paw; hairy skin of the mid back | 61.22 GHz | 15 mW/cm <sup>2</sup>                  |         | 15 min                                                              | <i>Hypoalgesia, Cold-water tail flick test</i>                                             | Yes | Yes | Yes | No  | No  | Yes |
| [62] | Humans                                                                           | 42.25 GHz | 25 mW/cm <sup>2</sup>                  |         | 30 min                                                              | Suppression of pain sensation                                                              | Yes | Yes | Yes | Yes | Yes | No  |
| [63] | Male Swiss albino mice                                                           | 61.22 GHz | 15 mW/cm <sup>2</sup>                  |         | 15 min                                                              | Scratching frequency during 90 min after s.c. Injection of pruritus (itching) agent 48/80. | Yes | No  | Yes | No  | No  | Yes |
| [64] | Male Swiss albino mice                                                           | 61.22 GHz | 0.15, 0.5, 1.5, 5.0 mW/cm <sup>2</sup> |         | 15 min                                                              | Tail withdrawal as pain response in cold water flick test                                  | Yes | Yes | Yes | No  | No  | Yes |
| [65] | Leech<br>Individual neurons in the leech midbody ganglia                         | 60-GHz    | 1, 2, and 4 mW/cm <sup>2</sup>         |         | 1 min                                                               | Real-time effects on action potential, and as "positive control" bath heating              | Yes | No  | No  | Yes | No  | Yes |
| [66] | Male Sprague-Dawley rats                                                         | 35 GHz    | 75 mW/cm <sup>2</sup>                  | 13 W/kg | Until mean arterial pressure dropped to 75 mm Hg (36.7 +/- 0.7 min) | Mean arterial pressure, heart rate, body temperature                                       | Yes | No  | Yes | No  | No  | Yes |
| [67] | Male Sprague-Dawley rats                                                         | 35 GHz    | 75 mW/cm <sup>2</sup>                  | 13 W/kg | Until mean arterial pressure                                        | Mean arterial pressure, heart rate, body temperature                                       | Yes | No  | Yes | No  | No  | Yes |

---

|      |                                                          |           |                                                                                                                      |                     |                                                                                                |                                                                                         |     |     |     |     |    |     |     |
|------|----------------------------------------------------------|-----------|----------------------------------------------------------------------------------------------------------------------|---------------------|------------------------------------------------------------------------------------------------|-----------------------------------------------------------------------------------------|-----|-----|-----|-----|----|-----|-----|
|      |                                                          |           |                                                                                                                      |                     | dropped<br>to 75 mm<br>Hg (36.7<br>+/- 0.7<br>min)                                             |                                                                                         |     |     |     |     |    |     |     |
| [68] | NMRI mice,<br>peritoneal<br>neutrophils                  | 41.95 GHz | 19.5 $\mu$ W/cm <sup>2</sup>                                                                                         | 0.45<br>W/kg        | 20 min at<br>20 oc                                                                             | ROS production                                                                          | Yes | No  | Yes | No  | No | No  | No  |
| [69] | Male Wistar<br>rats                                      | 54 GHz    | 150 mW/cm <sup>2</sup>                                                                                               |                     | 10 min                                                                                         | Conditioned<br>avoidance response to<br>induced pain<br>stimulus                        | Yes | No  | No  | No  | No | No  | No  |
| [70] | Xenopus<br>laevis<br>embryonal<br>spinal cord<br>neurons | 94 GHz    | 31 mW/cm <sup>2</sup>                                                                                                |                     | Seconds                                                                                        | Microtubule<br>assembly/disassembl<br>y                                                 | Yes | Yes | No  | Yes | No | Yes | Yes |
| [71] | Male Wistar<br>rats                                      | 42.2 GHz  | Not provided                                                                                                         | Not<br>provide<br>d | 2 × 40<br>min with<br>40 min<br>interval<br>before<br>and after<br>electric<br>stimulati<br>on | C-Fos activation in<br>hypothalamus; NK<br>cell activitiy in spleen                     | Yes | No  | No  | No  | No | No  | No  |
| [72] | Xenopus<br>laevis oocytes                                | 60 GHz    | 0.18–6<br>mw/mm <sup>2</sup> at<br>the bottom of<br>the oocyte and<br>0.01– 0.33<br>mw/mm <sup>2</sup> at<br>the top |                     | 2h                                                                                             | Membrane<br>excitability protein<br>expression by<br>electrophysiological<br>recordings | Yes | No  | Yes | Yes | No | Yes | Yes |

---

|      |           |        |                                                                                                                |                  |                                                                                                        |                                                                                              |                                                                                     |                              |             |     |    |    |     |
|------|-----------|--------|----------------------------------------------------------------------------------------------------------------|------------------|--------------------------------------------------------------------------------------------------------|----------------------------------------------------------------------------------------------|-------------------------------------------------------------------------------------|------------------------------|-------------|-----|----|----|-----|
| [73] |           |        | Human buccal epithelium cells from female donors                                                               | 42.2 GHz         | 0.2 mW/cm <sup>2</sup>                                                                                 | 5 sec                                                                                        | Electronegativity of cell nuclei; presence of heterochromatin granules in nuclei    | Yes                          | No          | Yes | No | No | Yes |
| [74] | Male rats | Wistar |                                                                                                                | 40 GHz           | Not given                                                                                              | 3 x 10 min, 10 min interval                                                                  | Electric activity in spinal trigeminal nucleus neurons                              | Yes                          | No          | No  | No | No | No  |
| [75] |           |        | Primary human neonatal keratinocytes                                                                           | HACAT            | 60.4 GHz                                                                                               | 20 mW/cm <sup>2</sup> ; co-exposure with a glycolysis inhibitor, 2-deoxyglucose (2dg, 20 mm) | 3 h                                                                                 | Whole genome and ATP content | Co-exp. Yes | Yes | No | No | Yes |
| [76] |           |        | BHK-21/C13 cells                                                                                               | 41.8 or 74.0 GHz | 320 or 450 mW/cm <sup>2</sup> , with or without cooling (42°C); 600, 800, and 1,000 mW/cm <sup>2</sup> | 1 h                                                                                          | Morphological changes investigated by Scanning and Transmission Electron Microscopy | Yes/no                       | Yes         | Np  | No | No | Yes |
| [77] |           |        | Mouse embryonal carcinoma cell line P19 induced to neural differentiation, human epidermal keratinocytes HEKN, | 94 GHz           | Not given                                                                                              | 30 min, 60 min                                                                               | Intracellular oscillations, release, production                                     | Ca <sup>2+</sup> ATP NO      | Yes         | Yes | No | No | Yes |

|      |                                                   | alone and as<br>as co-culture                                                                                                       |                                                                                             |                                                                                 |                             |                                                                                                                       |                                                                                                                |                                                                                                                                                                                            |     |     |     |     |     |     |  |
|------|---------------------------------------------------|-------------------------------------------------------------------------------------------------------------------------------------|---------------------------------------------------------------------------------------------|---------------------------------------------------------------------------------|-----------------------------|-----------------------------------------------------------------------------------------------------------------------|----------------------------------------------------------------------------------------------------------------|--------------------------------------------------------------------------------------------------------------------------------------------------------------------------------------------|-----|-----|-----|-----|-----|-----|--|
| [78] | Plasma from<br>exposed<br>Sprague-<br>Dawley rats | Rat NR8383<br>macrophage<br>cells                                                                                                   | 35 GHz                                                                                      | 75 mW/cm <sup>2</sup>                                                           |                             |                                                                                                                       | 46 min<br>(until<br>core<br>temperat<br>ure<br>reached<br>41 °C in<br>exposed<br>rats)                         | Protein<br>changes<br>oxidative<br>marker<br>3-<br>nitrotyrosine (3-NT)                                                                                                                    | Yes | Yes | Yes | Yes | No  | Yes |  |
| [79] | Human<br>peripheral<br>blood<br>(frozen)          | Human<br>epidermal<br>keratinocyte<br>s - hacat;<br>human T-<br>lyphoblast<br>Jurkat cells;<br>mouse<br>B16F10<br>melanoma<br>cells | 42.25 GHz                                                                                   | 34.5 mW/cm <sup>2</sup> ,<br>0.55 W/cm <sup>2</sup> ,<br>1.23 W/cm <sup>2</sup> |                             |                                                                                                                       | 30 min                                                                                                         | Coagulation (human<br>whole blood, blood<br>cell components,<br>plasma, HaCat cells);<br>apoptosis marker<br>expression (Annexin<br>V staining,<br>phosphatidyl serine<br>externalization) | Yes | Yes | No  | Yes | No  | Yes |  |
| [80] |                                                   | Human<br>epidermal<br>keratinocyte<br>s - HaCat                                                                                     | 42.25 GHz<br>(high power<br>MMW<br>exposure),<br>61.2 GHz<br>(low-power<br>MMW<br>exposure) | 29 mW/cm <sup>2</sup> ,<br>1670 mW/cm <sup>2</sup>                              | 770<br>W/kg,<br>37<br>kw/kg | 30 min<br>(chemoki<br>ne<br>producti<br>on, gap-<br>junction<br>communi<br>cation),<br>60 min<br>(viability,<br>Hsp70 | Chemokine<br>production (RANTES,<br>IP-10), viability, Hsp<br>70 production, gap-<br>junction<br>communication | No                                                                                                                                                                                         | Yes | Yes | Yes | No  | Yes |     |  |

|      |     |                                                                                                                                    |           |                                     |          |                                                                         |                                                                                                                                                                                                                | producti<br>on) |     |      |     |     |     |     |     |
|------|-----|------------------------------------------------------------------------------------------------------------------------------------|-----------|-------------------------------------|----------|-------------------------------------------------------------------------|----------------------------------------------------------------------------------------------------------------------------------------------------------------------------------------------------------------|-----------------|-----|------|-----|-----|-----|-----|-----|
| [81] |     | Human epidermal keratinocytes - HaCat                                                                                              | 61.2 GHz  | 29 mW/cm <sup>2</sup>               | 770 W/kg | 15 or 30 min, at room temperature                                       | Proliferation, adhesion, chemotaxis (spontaneous or cytokine-induced), IL-1beta production                                                                                                                     | Yes             | Yes | Yes  | Yes | Yes | Yes | Yes | Yes |
| [82] |     | Mouse P19 embryonal carcinoma cells induced to neuronal differentiation with retinoic cells.<br>Human fibrosarcoma HAT-1080 cells. | 94 GHz    | 310, 78, and 186 mW/cm <sup>2</sup> |          | 60 min P19 cells. 30 min H-1080 cells.                                  | P19 cells - Ca2+ oscillations in real time in the presence of absence of inhibitors of N-type Ca2+ channels, Ca2+ atpase, phospholipase C. NO production. H-1080 cells actin structure and cellular mechanics. | Yes             | No. | Yes. | Yes | No  | Yes | No  | Yes |
| [83] | Rat | Bone marrow stem cells (BMSC)                                                                                                      | 36.11 GHz | 10 mW/cm <sup>2</sup>               |          | 3 × 10 min every 2 h following beta-mercapto ethanol treatment for 24 h | Differentiation into nerve cells from BMSC                                                                                                                                                                     | Yes             | No  | No   | No  | No  | No  | No  | No  |



|      |                                                     |               |                         |          |                                                                              |                                                                                                                                                  |     |     |     |     |    |     |
|------|-----------------------------------------------------|---------------|-------------------------|----------|------------------------------------------------------------------------------|--------------------------------------------------------------------------------------------------------------------------------------------------|-----|-----|-----|-----|----|-----|
| [84] | BALB/c mouse, nose                                  | 42.2 GHz      | 31,5 mW/cm <sup>2</sup> | 622 W/kg | 30 min/day for 3 consecutive days                                            | Genotoxicity, also with pretreated with cyclophosphamide (CPA)                                                                                   | No  | Yes | Yes | Yes | No | No  |
| [85] | Human whole blood or isolated neutrophils in plasma | 32.9-39.6 GHz | 10 mW/cm <sup>2</sup>   | 145 w/kg | 5, 15, 30 min                                                                | Ros generating activity seen as luminol-dependent chemoluminescence; myeloperoxidase activity; neutrophil morphology typical for activated cells | Yes | No  | No  | Yes | No | Yes |
| [86] | Cryopreserved spermatozoa                           | 42.25 GHz     | 0.03 mW/cm <sup>2</sup> |          | 5, 10, 15 min                                                                | Motility, membrane integrity, chromatin decondensation, apoptosis (Annexin V)                                                                    | Yes | No  | No  | No  | No | No  |
| [87] | Chondrocytes                                        | 30-40 GHz     | 4 mW/cm <sup>2</sup>    |          | 30 min/day for three consecutive days; 60 min/day for three consecutive days | Apoptosis (Annexin V, mitochondrial membrane potential, cytochrome c, caspase-3 activation)                                                      | Yes | No  | No  | Yes | No | No  |

|      |                                             |                                                                           |                                                   |                                                                                                                                                    |                                                                      |                                                                                                                                                                                  |     |     |    |     |    |     |
|------|---------------------------------------------|---------------------------------------------------------------------------|---------------------------------------------------|----------------------------------------------------------------------------------------------------------------------------------------------------|----------------------------------------------------------------------|----------------------------------------------------------------------------------------------------------------------------------------------------------------------------------|-----|-----|----|-----|----|-----|
| [88] | Sprague-Dawley rats                         | Mesenchymal stem cells                                                    | 30-40 GHz                                         | 4 mW/cm <sup>2</sup>                                                                                                                               | 30 min/day for 1, 4, 8 or 12 days; 60 min/day for 1, 4, 8 or 12 days | Chondrocyte differentiation (Cbfa1 and Sox9 expression, cellular morphology, heterochromia, collagen II expression)                                                              | Yes | No  | No | No  | No | No  |
| [89] | New Zealand White rabbits (male and female) |                                                                           | 37.5 GHz                                          | 10 mW/cm <sup>2</sup>                                                                                                                              | 20 min per day for 10 days, six weeks after surgery                  | Histologic appearance (Modified Mankin Score (MMS); chondrocyte apoptosis; caspase-3, caspase-8, and MMP-13 expression)                                                          | Yes | Yes | No | No  | No | No  |
| [90] | Male Sprague-Dawley rats                    |                                                                           | 35 GHz                                            | 500, 900, 1200, 1500 mW/cm <sup>2</sup> at 3.6 cm <sup>2</sup> (irradiated area), 1500, 3500, 5000, 7500 mW/cm <sup>2</sup> at 1.8 cm <sup>2</sup> | 30 s                                                                 | EEG wavelet analysis documenting stress reactions                                                                                                                                | Yes | Yes | No | No  | No | Yes |
| [91] |                                             | Normal human skin fibroblast (NB1RBG) and human glioblastoma (A172) cells | Sweeping from 70 GHz to 300 GHz in 1.0 GHz steps. | 10 μW, 1.27 μW/cm <sup>2</sup> at 100 GHz and 0.38 μW/cm <sup>2</sup> at 300 GHz.                                                                  | 3, 70 or 94 h                                                        | Proliferation, and MTS [3-(4,5-dimethylthiazol-2-yl)-5-(3-carboxymethoxyphenyl)-2-(4-sulfophenyl)-2H-tetrazolium, inner salt] was used for cell activity and cytotoxicity assays | No  | Yes | No | Yes | No | Yes |

|      |                   |                                                           |           |                                                   |                                                                                                      |          |                                                                                                                                 |    |     |     |     |    |                    |
|------|-------------------|-----------------------------------------------------------|-----------|---------------------------------------------------|------------------------------------------------------------------------------------------------------|----------|---------------------------------------------------------------------------------------------------------------------------------|----|-----|-----|-----|----|--------------------|
| [92] | E. Coli xl-1 blue |                                                           | 42 GHz    | 2.6 mW/m <sup>2</sup> , 32 mW/m <sup>2</sup>      |                                                                                                      | 40 min   | Growth rate, absorption spectra at 41-42 GHz, dna plasmid transformation efficiency                                             | No | No  | Yes | No  | No | No                 |
| [93] |                   | Keratinocytes HaCat, astrocytoma glial cell line U-251 MG | 60.42 GHz | 1 mW/cm <sup>2</sup>                              | Between 17 and 21.4 W/kg for 6-well and between 13.7 and 26.2 W/kg for 96-well tissue culture plates |          | Cell viability and intracellular protein homeostasis                                                                            | No | Yes | Yes | Yes | No | No, but calculated |
| [94] |                   | U-251 MG glial cell                                       | 60 GHz    | 5.4 mW/cm <sup>2</sup> or 0.54 mW/cm <sup>2</sup> |                                                                                                      | 1 – 33 h | Gene expression of molecular chaperones clusterin and Hsp70; specifically transcription activation, mRNA levels, protein levels | No | Yes | No  | Yes | No | No                 |

- [1] S. I. Alekseev, O. V Gordienko, A. A. Radzievsky, and M. C. Ziskin, "Millimeter wave effects on electrical responses of the sural nerve in vivo.," *Bioelectromagnetics*, vol. 31, no. 3, pp. 180–90, 2010.

- [2] S. I. Alekseev, A. A. Radzievsky, I. Szabo, and M. C. Ziskin, "Local heating of human skin by millimeter waves: Effect of blood flow," *Bioelectromagnetics*, vol. 26, no. 6, pp. 489–501, Sep. 2005.
- [3] S. I. Alekseev and M. C. Ziskin, "Effects of millimeter waves on ionic currents of *Lymnaea* neurons," *Bioelectromagnetics*, vol. 20, no. 1, pp. 24–33, 1999.
- [4] S. I. Alekseev, M. C. Ziskin, N. V. Kochetkova, and M. A. Bolshakov, "Millimeter waves thermally alter the firing rate of the *Lymnaea* pacemaker neuron," *Bioelectromagnetics*, vol. 18, no. 2, pp. 89–98, 1997.
- [5] S. I. Alekseev and M. C. Ziskin, "Millimeter microwave effect on ion transport across lipid bilayer membranes," *Bioelectromagnetics*, 1995.
- [6] A. Bellossi, G. Dubost, J. P. Moulinoux, M. Himdi, M. Ruelloux, and C. Rocher, "Biological Effects of Millimeter-Wave Irradiation on Mice—Preliminary Results," *IEEE Trans. Microw. Theory Tech.*, vol. 48, no. 11, 2000.
- [7] A. Beneduci, G. Chidichimo, R. De Rose, L. Filippelli, S. V. Straface, and S. Venuta, "Frequency and irradiation time-dependant antiproliferative effect of low-power millimeter waves on RPMI 7932 human melanoma cell line," *Anticancer Res.*, vol. 25, no. 2A, pp. 1023–8, 2005.
- [8] A. Beneduci, G. Chidichimo, S. Tripepi, and E. Perrotta, "Transmission electron microscopy study of the effects produced by wide-band low-power millimeter waves on MCF-7 human breast cancer cells in culture," *Anticancer Res.*, vol. 25, no. 2A, pp. 1009–13, 2005.
- [9] A. Beneduci, G. Chidichimo, S. Tripepi, E. Perrotta, and F. Cufone, "Antiproliferative effect of millimeter radiation on human erythromyeloid leukemia cell line K562 in culture: Ultrastructural- and metabolic-induced changes," *Bioelectrochemistry*, vol. 70, no. 2, pp. 214–220, May 2007.
- [10] A. Beneduci, "Evaluation of the Potential In Vitro Antiproliferative Effects of Millimeter Waves at Some Therapeutic Frequencies on RPMI 7932 Human Skin Malignant Melanoma Cells," *Cell Biochem. Biophys.*, vol. 55, no. 1, pp. 25–32, Sep. 2009.
- [11] L. G. Bush, D. W. Hill, A. Riazi, L. J. Stensaas, L. M. Partlow, and O. P. Gandhi, "Effects of millimeter-wave radiation on monolayer cell cultures. III. A search for frequency-specific athermal biological effects on protein synthesis," *Bioelectromagnetics*, 1981.
- [12] I. Chatterjee, J. Yoon, and R. Wiese, "Millimeter wave bioeffects at 94 GHz on skeletal muscle contraction," *2013 IEEE Top.*, pp. 67–69, 2013.
- [13] Q. Chen, Q. L. Zeng, D. Q. Lu, and H. Chiang, "Millimeter Wave Exposure Reverses TPA Suppression of Gap Junction Intercellular Communication in HaCaT Human Keratinocytes," *Bioelectromagnetics*, vol. 25, no. 1, pp. 1–4, 2004.
- [14] S. D'Agostino *et al.*, "Extremely High Frequency Electromagnetic Fields Facilitate Electrical Signal Propagation by Increasing Transmembrane Potassium Efflux in an Artificial Axon Model," *Sci. Rep.*, 2018.
- [15] A. Deghoyan, A. Heqimyan, A. Nikoghosyan, E. Dadasyan, and S. Ayrapetyan, "Cell bathing medium as a target for non thermal effect of millimeter waves," *Electromagn. Biol. Med.*, vol. 31, no. 2, pp. 132–42, 2012.
- [16] S. J.-P. Egot-Lemaire and M. C. Ziskin, "Dielectric properties of human skin at an acupuncture point in the 50-75 GHz frequency range: a pilot study," *Bioelectromagnetics*, vol. 32, no. 5, pp. 360–6, Jul. 2011.
- [17] V. Franchini *et al.*, "Genotoxic Effects in Human Fibroblasts Exposed to Microwave Radiation," *Health Phys.*, vol. 115, no. 1, pp. 126–139, Jul. 2018.
- [18] M. R. Frei, K. L. Ryan, R. E. Berger, and J. R. Jauchem, "Sustained 35-GHz radiofrequency irradiation induces circulatory failure," *Shock*, vol. 4, no. 4, pp. 289–93, Oct. 1995.
- [19] A. B. Gapeyev, T. P. Kulagina, A. V. Aripovsky, and N. K. Chemeris, "The role of fatty acids in anti-inflammatory effects of low-intensity extremely high-frequency electromagnetic radiation," *Bioelectromagnetics*, vol. 32, no. 5, pp. 388–395, 2011.
- [20] A. B. Gapeyev, A. B. Gapeyev, E. N. Mikhailik, E. N. Mikhailik, N. K. Chemeris, and N. K. Chemeris, "Anti-inflammatory effects of low-intensity

- extremely high-frequency electromagnetic radiation: frequency and power dependence.," *Bioelectromagnetics*, vol. 29, no. 3, pp. 197–206, 2008.
- [21] A. B. Gapeyev, V. G. Safronova, N. K. Chemeris, and E. E. Fesenko, "Inhibition of the production of reactive oxygen species in mouse peritoneal neutrophils by millimeter wave radiation in the near and far field zones of the radiator," *Bioelectrochemistry Bioenerg.*, vol. 43, no. 2, pp. 217–220, Aug. 1997.
- [22] V. Geletyuk and V. Kazachenko, "Dual effects of microwaves on single Ca<sup>2+</sup>-activated K<sup>+</sup> channels in cultured kidney cells Vero," *FEBS Lett.*, vol. 359, no. 1, pp. 85–88, 1995.
- [23] W. Grundier and F. Keilmann, "Nonthermal Effects of Millimeter Microwaves on Yeast Growth," *Zeitschrift für Naturforsch. C*, vol. 33, no. 1–2, pp. 15–22, Feb. 1978.
- [24] A. J. Haas, Y. Le Page, M. Zhadobov, A. Boriskin, R. Sauleau, and Y. Le Dréan, "Impact of 60-GHz millimeter waves on stress and pain-related protein expression in differentiating neuron-like cells," *Bioelectromagnetics*, vol. 37, no. 7, pp. 444–454, Oct. 2016.
- [25] A. J. Haas, Y. Le Page, M. Zhadobov, R. Sauleau, Y. Le Dréan, and C. Saligaut, "Effect of acute millimeter wave exposure on dopamine metabolism of NGF-treated PC12 cells," *J. Radiat. Res.*, vol. 58, no. 4, pp. 439–445, Jul. 2017.
- [26] A. J. Haas, Y. Le Page, M. Zhadobov, R. Sauleau, and Y. Le Dréan, "Effects of 60-GHz millimeter waves on neurite outgrowth in PC12 cells using high-content screening," *Neurosci. Lett.*, vol. 618, pp. 58–65, Apr. 2016.
- [27] D. Habauzit *et al.*, "Transcriptome analysis reveals the contribution of thermal and the specific effects in cellular response to millimeter wave exposure," *PLoS One*, vol. 9, no. 10, 2014.
- [28] V. B. Ivanov, T. I. Subbotina, A. A. Khadartsev, M. A. Yashin, and A. A. Yashin, "Exposure to low-intensive superhigh frequency electromagnetic field as a factor of carcinogenesis in experimental animals," *Bull. Exp. Biol. Med.*, vol. 139, no. 2, pp. 241–244, 2005.
- [29] J. R. Jauchem, K. L. Ryan, and T. J. Walters, "Pathophysiological alterations induced by sustained 35-GHz radio-frequency energy heating," *J. Basic Clin. Physiol. Pharmacol.*, vol. 27, no. 1, pp. 79–89, 2016.
- [30] M. Kojima *et al.*, "Acute ocular injuries caused by 60-GHz millimeter-wave exposure," *Heal. Phys.*, vol. 97, no. 3, pp. 212–218, 2009.
- [31] M. Kojima *et al.*, "Ocular Effects of Exposure to 40, 75, and 95 GHz Millimeter Waves," *J. Infrared, Millimeter, Terahertz Waves*, vol. 39, no. 9, pp. 912–925, Sep. 2018.
- [32] A. Korenstein-Ilan, A. Barbul, P. Hasin, A. Eliran, A. Gover, and R. Korenstein, "Terahertz Radiation Increases Genomic Instability in Human Lymphocytes," *Radiat. Res.*, vol. 170, no. 2, pp. 224–234, 2008.
- [33] C. Koschnitzke, F. Kremer, L. Santo, P. Quick, and A. Poglitsch, "A Non-Thermal Effect of Millimeter Wave Radiation on the Puffing of Giant Chromosomes," *Zeitschrift für Naturforsch. C*, vol. 38, no. 9–10, pp. 883–886, Oct. 1983.
- [34] S. Koyama *et al.*, "Effects of long-term exposure to 60 GHz millimeter-wavelength radiation on the genotoxicity and heat shock protein (HSP) expression of cells derived from human eye," *Int. J. Environ. Res. Public Health*, vol. 13, no. 8, 2016.
- [35] H. A. Kues, S. A. D. Anna, R. Osiander, W. R. Green, and J. C. Monahan, "Absence of Ocular Effects After Either Single or Repeated Exposure to 10 mW / cm<sup>2</sup> From a 60 GHz CW Source," *Bioelectromagnetics*, vol. 473, no. January, pp. 463–473, 1999.
- [36] C. Le Quément *et al.*, "Whole-genome expression analysis in primary human keratinocyte cell cultures exposed to 60 GHz radiation," *Bioelectromagnetics*, vol. 33, no. 2, pp. 147–158, Feb. 2012.
- [37] C. LeQuément, C. N. Nicolaz, D. Habauzit, M. Zhadobov, R. Sauleau, and Y. Le Dréan, "Impact of 60-GHz millimeter waves and corresponding heat

- effect on endoplasmic reticulum stress sensor gene expression," *Bioelectromagnetics*, vol. 35, no. 6, pp. 444–451, 2014.
- [38] X. Li *et al.*, "Millimeter wave treatment promotes chondrocyte proliferation via G 1/S cell cycle transition," *Int. J. Mol. Med.*, vol. 29, no. 5, pp. 823–831, 2012.
- [39] M. K. Logani, A. Agelan, and M. C. Ziskin, "EFFECT OF MILLIMETER WAVE RADIATION ON CATALASE ACTIVITY," *Electromagn. Biol. Med.*, vol. 21, no. 3, pp. 303–308, Jan. 2002.
- [40] M. K. Logani, A. Anga, I. Szabo, A. Agelan, A. R. Irizarry, and M. C. Ziskin, "Effect of millimeter waves on cyclophosphamide induced suppression of the immune system.," *Bioelectromagnetics*, vol. 23, no. 8, pp. 614–621, Dec. 2002.
- [41] V. Makar, M. Logani, I. Szabo, and M. Zlskin, "Effect of Millimeter Waves on Cyclophosphamide Induced Suppression of T Cell Functions," *Bioelectromagnetics*, vol. 24, no. 5, pp. 356–365, 2003.
- [42] V. R. Makar, M. K. Logani, A. Bhanushali, S. I. Alekseev, and M. C. Ziskin, "Effect of cyclophosphamide and 61.22 GHz millimeter waves on T-cell, B-cell, and macrophage functions," *Bioelectromagnetics*, vol. 27, no. 6, pp. 458–466, 2006.
- [43] V. R. Makar, M. K. Logani, A. Bhanushali, M. Kataoka, and M. C. Ziskin, "Effect of millimeter waves on natural killer cell activation," *Bioelectromagnetics*, 2005.
- [44] P. A. Mason *et al.*, "Lack of effect of 94 GHz radio frequency radiation exposure in an animal model of skin carcinogenesis in the radio frequency radiation ( RFR ) band is mutagenic , as either a promoter or co-promoter in some animal models of carcinogenesis . Recent develop," *Carcinogenesis*, vol. 22, no. 10, pp. 1701–1708, 2001.
- [45] N. J. Millenbaugh *et al.*, "Comparison of blood pressure and thermal responses in rats exposed to millimeter wave energy or environmental heat," *Shock*, vol. 25, no. 6, pp. 625–632, 2006.
- [46] N. J. Millenbaugh *et al.*, "Gene expression changes in the skin of rats induced by prolonged 35 GHz millimeter-wave exposure.," *Radiat. Res.*, vol. 169, no. 3, pp. 288–300, 2008.
- [47] L. Narinyan and S. Ayrapetyan, "Cyclic AMP-dependent signaling system is a primary metabolic target for non-thermal effect of microwaves on heart muscle hydration," *Electromagn. Biol. Med.*, vol. 36, no. 2, pp. 182–191, Apr. 2017.
- [48] T. H. P. Nguyen *et al.*, "The bioeffects resulting from prokaryotic cells and yeast being exposed to an 18 GHz electromagnetic field," *PLoS One*, 2016.
- [49] C. N. Nicolaz *et al.*, "Study of narrow band millimeter-wave potential interactions with endoplasmic reticulum stress sensor genes," *Bioelectromagnetics*, vol. 30, no. 5, pp. 365–373, 2009.
- [50] N. C. Nicolaz *et al.*, "Absence of direct effect of low-power millimeter-wave radiation at 60.4 GHz on endoplasmic reticulum stress.," *Cell Biol. Toxicol.*, vol. 25, no. 5, pp. 471–8, Oct. 2009.
- [51] A. G. Pakhomov, H. K. Prol, S. P. Mathur, Y. Akyel, and C. B. G. B. G. Campbell, "Role of field intensity in the biological effectiveness of millimeter waves at a resonance frequency," *Bioelectrochemistry Bioenerg.*, vol. 43, no. 1, pp. 27–33, Jun. 1997.
- [52] A. G. Pakhomov, H. K. Prol, S. P. Mathur, Y. Akyel, and C. B. Campbell, "Search for frequency-specific effects of millimeter-wave radiation on isolated nerve function.," *Bioelectromagnetics*, vol. 18, no. 4, pp. 324–334, 1997.
- [53] L. M. Partlow, L. G. Bush, L. J. Stensaas, D. W. Hill, A. Riazi, and O. P. Gandhi, "Effects of millimeter-wave radiation on monolayer cell cultures. I. Design and validation of a novel exposure system," *Bioelectromagnetics*, 1981.

- [54] T. Partyła, H. Hacker, H. Edinger, B. Leutzow, J. Lange, and T. Usichenko, "Remote Effects of Electromagnetic Millimeter Waves on Experimentally Induced Cold Pain: A Double-Blinded Crossover Investigation in Healthy Volunteers," *Anesth. Analg.*, vol. 124, no. 3, pp. 980–985, 2017.
- [55] V. Píkov, X. Arakaki, M. Harrington, S. E. Fraser, and P. H. Siegel, "Modulation of neuronal activity and plasma membrane properties with low-power millimeter waves in organotypic cortical slices," *J. Neural Eng.*, vol. 7, no. 4, p. 045003, Aug. 2010.
- [56] A. Radzievsky, O. Gordiienko, A. Cowan, S. . Alekseev, and M. . Ziskin, "Millimeter-Wave-Induced Hypoalgesia in Mice: Dependence on Type of Experimental Pain," *IEEE Trans. Plasma Sci.*, vol. 32, no. 4, pp. 1634–1643, Aug. 2004.
- [57] A. A. Radzievsky, A. Cowan, C. Byrd, A. A. Radzievsky, and M. C. Ziskin, "Single millimeter wave treatment does not impair gastrointestinal transit in mice," *Life Sci.*, vol. 71, no. 15, pp. 1763–1770, 2002.
- [58] A. A. Radzievsky, O. V. Gordiienko, S. Alekseev, I. Szabo, A. Cowan, and M. C. Ziskin, "Electromagnetic millimeter wave induced hypoalgesia: Frequency dependence and involvement of endogenous opioids," *Bioelectromagnetics*, vol. 29, no. 4, pp. 284–295, May 2008.
- [59] A. Radzievsky, O. Gordiienko, I. Szabo, S. I. Alekseev, and M. C. Ziskin, "Millimeter wave-induced suppression of B16 F10 melanoma growth in mice: involvement of endogenous opioids.," *Bioelectromagnetics*, vol. 25, no. 6, pp. 466–73, Sep. 2004.
- [60] A. A. Radzievsky, M. A. Rojavin, A. Cowan, S. I. Alekseev, A. A. Radzievsky, and M. C. Ziskin, "Peripheral neural system involvement in hypoalgesic effect of electromagnetic millimeter waves," *Life Sci.*, vol. 68, no. 10, pp. 1143–1151, 2001.
- [61] A. A. Radzievsky, M. A. Rojavin, A. Cowan, S. I. Alekseev, and M. C. Ziskin, "Hypoalgesic effect of millimeter waves in mice: Dependence on the site of exposure," *Life Sci.*, vol. 66, no. 21, pp. 2101–2111, 2000.
- [62] A. A. Radzievsky, M. A. Rojavin, A. Cowan, and M. C. Ziskin, "Suppression of pain sensation caused by millimeter waves: a double-blinded, cross-over, prospective human volunteer study.," *Anesth. Analg.*, vol. 88, no. 4, pp. 836–40, Apr. 1999.
- [63] M. A. Rojavin, A. Cowan, A. A. Radzievsky, and M. C. Ziskin, "Antipruritic effect of millimeter waves in mice: evidence for opioid involvement," *Life Sci.*, vol. 63, no. 18, pp. 251–257, 1998.
- [64] M. A. Rojavin, A. A. Radzievsky, A. Cowan, and M. C. Ziskin, "Pain relief caused by millimeter waves in mice: results of cold water tail flick tests," *Int J Radiat Biol*, vol. 76, no. 4, pp. 575–579, 2000.
- [65] S. Romanenko, P. H. Siegel, D. A. Wagenaar, and V. Píkov, "Effects of millimeter wave irradiation and equivalent thermal heating on the activity of individual neurons in the leech ganglion.," *J. Neurophysiol.*, vol. 112, no. 10, pp. 2423–31, 2014.
- [66] K. L. Ryan, M. R. Frei, R. E. Berger, and J. R. Jauchem, "Does nitric oxide mediate circulatory failure induced by 35-GHz microwave heating?," *Shock*, vol. 6, no. 1, pp. 71–6, Jul. 1996.
- [67] K. L. Ryan, M. R. Frei, and J. R. Jauchem, "Circulatory failure induced by 35 GHz microwave heating: effects of chronic nitric oxide synthesis inhibition.," *Shock*, vol. 7, no. 1, pp. 70–6, Jan. 1997.
- [68] V. G. Safronova, A. G. Gabdoulkhakova, and B. F. Santalov, "Immunomodulating Action of Low Intensity Millimeter Waves on Primed Neutrophils," *Bioelectromagnetics*, vol. 23, no. 8, pp. 599–606, 2002.
- [69] V. O. Samoilov, E. B. Shadrin, E. B. Filippova, Y. Katsnelson, H. Backhoff, and M. Eventov, "The effect of transcranial electromagnetic brain stimulation on the acquisition of the conditioned response in rats," *Biophysics (Oxf).*, vol. 60, no. 2, pp. 303–308, Mar. 2015.
- [70] A. Samsonov and S. V. Popov, "The effect of a 94 GHz electromagnetic field on neuronal microtubules.," *Bioelectromagnetics*, vol. 34, no. 2, pp. 133–44, 2013.

- [71] S. N. Shanin, E. G. Rybakina, N. N. Novikova, I. A. Kozinets, V. J. Rogers, and E. A. Korneva, "Natural killer cell cytotoxic activity and c-Fos protein synthesis in rat hypothalamic cells after painful electric stimulation of the hind limbs and EHF irradiation of the skin," *Med Sci Monit*, vol. 11, no. 9, pp. BR309-15, 2005.
- [72] M. G. Shapiro, M. F. Priest, P. H. Siegel, and F. Bezanilla, "Thermal Mechanisms of Millimeter Wave Stimulation of Excitable Cells," *Biophys. J.*, vol. 104, no. 12, pp. 2622–2628, Jun. 2013.
- [73] Y. G. Shckorbatov, N. N. Grigoryeva, V. G. Shakhbazov, V. A. Grabina, and A. M. Bogoslavsky, "Microwave irradiation influences on the state of human cell nuclei," *Bioelectromagnetics*, vol. 19, no. May 1999, pp. 414–419, 1998.
- [74] I. B. Sivachenko, D. S. Medvedev, I. D. Molodtsova, S. S. Pantelev, A. Y. Sokolov, and O. A. Lyubashina, "Effects of Millimeter-Wave Electromagnetic Radiation on the Experimental Model of Migraine," *Bull. Exp. Biol. Med.*, vol. 160, no. 4, pp. 425–428, 2016.
- [75] Y. Soubere Mahamoud *et al.*, "Additive Effects of Millimeter Waves and 2-Deoxyglucose Co-Exposure on the Human Keratinocyte Transcriptome," *PLoS One*, vol. 11, no. 8, p. e0160810, Aug. 2016.
- [76] L. J. Stensaas *et al.*, "Effects of millimeter-wave radiation on monolayer cell cultures. II. Scanning and transmission electron microscopy," *Bioelectromagnetics*, 1981.
- [77] S. Sun, I. Titushkin, J. Varner, and M. Cho, "Millimeter Wave-induced Modulation of Calcium Dynamics in an Engineered Skin Co-culture Model: Role of Secreted ATP on Calcium Spiking," *J. Radiat. Res.*, vol. 53, no. 2, pp. 159–167, 2012.
- [78] R. K. Sypniewska *et al.*, "Protein changes in macrophages induced by plasma from rats exposed to 35 GHz millimeter waves.," *Bioelectromagnetics*, vol. 31, no. 8, pp. 656–63, Dec. 2010.
- [79] I. Szabo, J. Kappelmayer, S. I. Alekseev, and M. C. Ziskin, "Millimeter wave induced reversible externalization of phosphatidylserine molecules in cells exposed in vitro," *Bioelectromagnetics*, vol. 27, no. 3, pp. 233–244, 2006.
- [80] I. Szabo, M. R. Manning, A. A. Radzlevsky, M. A. Wetzell, T. J. Rogers, and M. C. Ziskin, "Low Power Millimeter Wave Irradiation Exerts No Harmful Effect on Human Keratinocytes In Vitro," *Bioelectromagnetics*, vol. 24, no. 3, pp. 165–173, 2003.
- [81] I. Szabo, M. A. Rojavin, T. J. Rogers, and M. C. Ziskin, "Reactions of keratinocytes to in vitro millimeter wave exposure," *Bioelectromagnetics*, vol. 22, no. 5, pp. 358–364, 2001.
- [82] I. A. Titushkin, V. S. Rao, W. F. Pickard, E. G. Moros, G. Shafirstein, and M. R. Cho, "Altered Calcium Dynamics Mediates P19-Derived Neuron-Like Cell Responses to Millimeter-Wave Radiation," *Radiat. Res.*, vol. 172, no. 6, pp. 725–736, 2009.
- [83] Y. Tong *et al.*, "Millimeter-wave exposure promotes the differentiation of bone marrow stromal cells into cells with a neural phenotype.," *J. Huazhong Univ. Sci. Technol. Med. Sci.*, vol. 29, no. 4, pp. 409–12, 2009.
- [84] Vijayalaxmi, M. K. Logani, A. Bhanushali, M. C. Ziskin, and T. J. Prihoda, "Micronuclei in peripheral blood and bone marrow cells of mice exposed to 42 GHz electromagnetic millimeter waves.," *Radiat. Res.*, vol. 161, no. 3, pp. 341–5, Mar. 2004.
- [85] I. I. Vlasova, E. V. Mikhalchik, A. A. Gusev, N. G. Balabushevich, S. A. Gusev, and K. D. Kazarinov, "Extremely high-frequency electromagnetic radiation enhances neutrophil response to particulate agonists," *Bioelectromagnetics*, vol. 39, no. 2, pp. 144–155, Feb. 2018.
- [86] N. A. Volkova, E. V. Pavlovich, A. A. Gapon, and O. T. Nikolov, "Effects of Millimeter-Wave Electromagnetic Exposure on the Morphology and Function of Human Cryopreserved Spermatozoa," *Bull. Exp. Biol. Med.*, vol. 157, no. 5, pp. 574–576, Sep. 2014.



- [87] G. Wu *et al.*, "Millimeter wave treatment inhibits the mitochondrion-dependent apoptosis pathway in chondrocytes," *Mol. Med. Rep.*, vol. 4, no. 5, pp. 1001–1006, 2011.
- [88] G. W. Wu *et al.*, "Experimental study of millimeter wave-induced differentiation of bone marrow mesenchymal stem cells into chondrocytes," *Int J Mol Med*, vol. 23, no. 4, pp. 461–467, 2009.
- [89] L. Xia, Q.-L. Luo, H.-D. Lin, J.-L. Zhang, H. Guo, and C.-Q. He, "The effect of different treatment time of millimeter wave on chondrocyte apoptosis, caspase-3, caspase-8, and MMP-13 expression in rabbit surgically induced model of knee osteoarthritis," *Rheumatol. Int.*, vol. 32, no. 9, pp. 2847–2856, Sep. 2012.
- [90] T. Xie *et al.*, "EEG CHANGES AS HEAT STRESS REACTIONS IN RATS IRRADIATED BY HIGH INTENSITY 35 GHz MILLIMETER WAVES," *Health Phys.*, vol. 100, no. 6, pp. 632–640, Jun. 2011.
- [91] N. Yaekashiwa, S. Otsuki, S. Hayashi, and K. Kawase, "Investigation of the non-thermal effects of exposing cells to 70-300 GHz irradiation using a widely tunable source," *J. Radiat. Res.*, vol. 59, no. 2, pp. 116–121, Mar. 2018.
- [92] G. Yu *et al.*, "A study on biological effects of low-intensity millimeter waves," *IEEE Trans. Plasma Sci.*, vol. 30, no. 4, pp. 1489–1496, 2002.
- [93] M. Zhadobov, F. Desmots, D. Thouroude, D. Michel, and Y. Drean, "Evaluation of the potential biological effects of the 60-GHz millimeter waves upon human cells," *IEEE Trans. Antennas Propag.*, vol. 57, no. 10, pp. 2949–2956, 2009.
- [94] M. Zhadobov *et al.*, "Low-power millimeter wave radiations do not alter stress-sensitive gene expression of chaperone proteins," *Bioelectromagnetics*, vol. 28, no. 3, pp. 188–196, 2007.
